# Supplementary material for: A fast response TLC-SERS substrate for on-site detection of hydrophilic and hydrophobic adulterants in botanical dietary supplements
Source: Royal Society of Chemistry journal article supplement (doi:10.1039/c9nj02489a), 2019-01-01
Supplement: c9nj02489a1.pdf [file c9nj02489a1.pdf]

## Electronic Supplementary Material

### A fast response TLC-SERS substrate for on-site detection of hydrophilic and hydrophobic adulterants in botanical dietary supplements

Qingxia Zhu <sup>a</sup>, Yongbing Cao <sup>b\*</sup>, Dan Li <sup>cd</sup>, Fang Fang <sup>c</sup>, Feng Lu <sup>c\*</sup>, Yongfang Yuan <sup>a\*</sup>

<sup>a</sup> Department of Pharmacy, Shanghai 9th People's Hospital, Shanghai JiaoTong University School of Medicine, Shanghai, 201999, China. E-mail: nmxyyf@126.com

<sup>b</sup> Institute of Vascular Disease, Shanghai TCM-Integrated Hospital, Shanghai University of Traditional Chinese Medicine, Shanghai 200082, China. E-mail: ybcao@vip.sina.com

<sup>c</sup> Department of Pharmaceutical Analysis, School of Pharmacy, Second Military Medical University, Shanghai, 200433, China. E-mail: 13917563512@163.com

<sup>d</sup> Department of Pharmacy, Shanghai Chang Hai Hospital, Second Military Medical University, Shanghai, 200433, China.

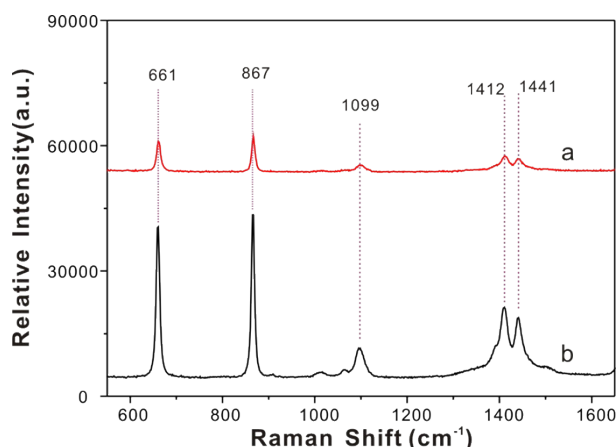

Fig. S1 (a) Blank SERS spectrum of DMF 2:1 silver colloid, and (b) Raman spectrum of DMF solvent.

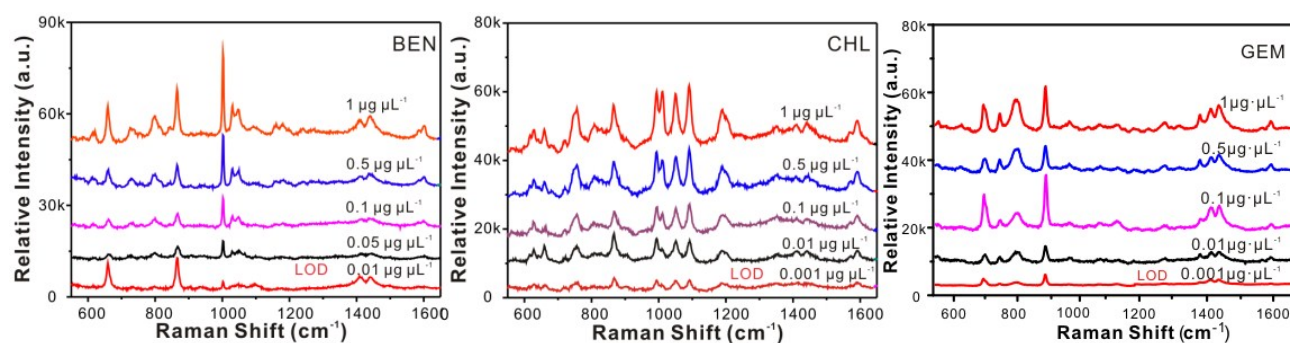

Fig. S2 (a) SERS spectra of different analytes with different concentrations using DMF 2:1 silver colloid.

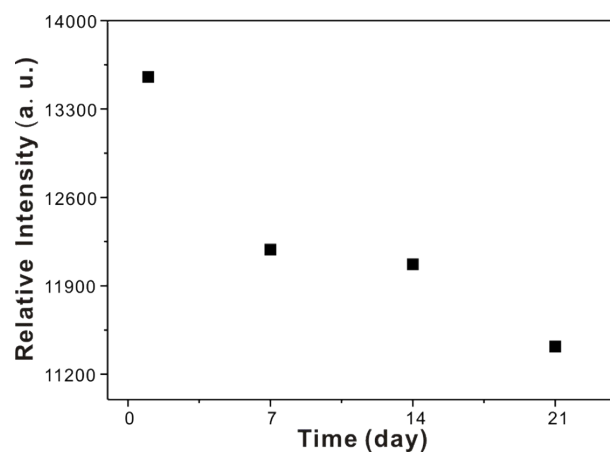

**Fig. S3** SERS intensity of CHL at 1091 cm<sup>-1</sup> detected by Lee-Meisel colloid changing with time (day).

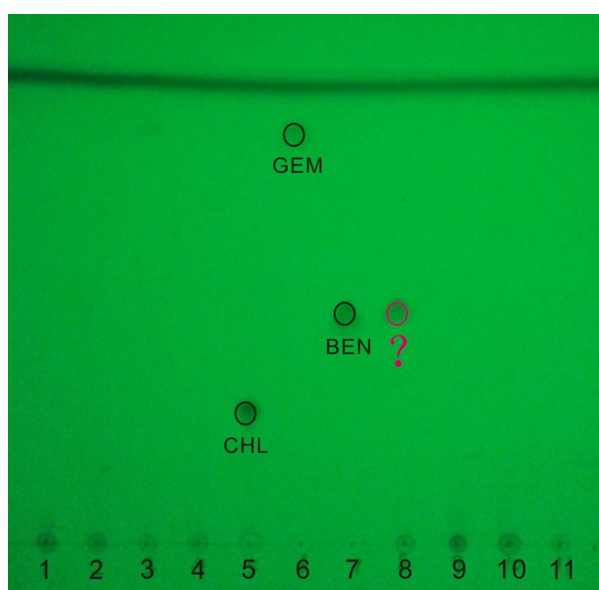

**Fig. S4** Results from TLC analysis of ten real samples developed with dichloromethane-methanol-water 9:1:0.1 (v: v: v), 1-4 (samples 1-4), 5-7 (references CHL, GEM, BEN), 8-11 (samples 5-8).

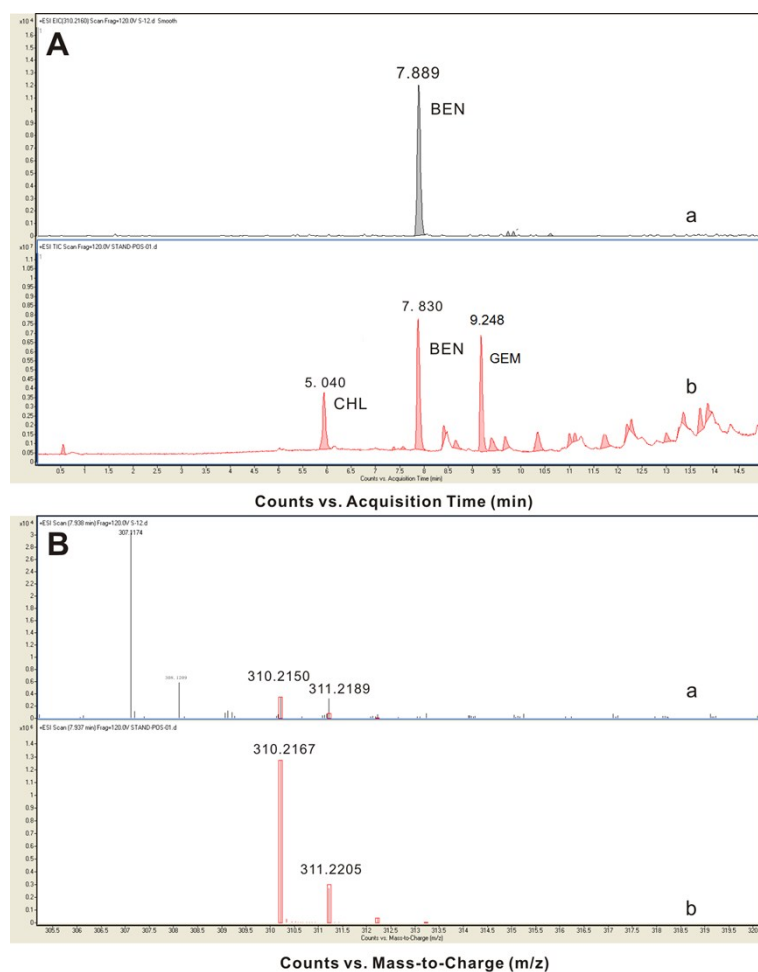

**Fig. S5** (A) HPLC spectra of sample 5 (a) and standards of CHL, DIP, BEN (b); (B) MS spectra of sample 5 (a) and standard of BEN (b)

**Table S1** Composition of reactants used.

| Colloids | Mass of AgNO <sub>3</sub> (mg) | Mass of PVP (mg) | Mass ratio of AgNO <sub>3</sub> to PVP |
|----------|--------------------------------|------------------|----------------------------------------|
| DMF 1:1  | 8.5                            | 8.5              | 1:1                                    |
| DMF 2:1  | 17.0                           | 8.5              | 2:1                                    |
| DMF 3:1  | 25.5                           | 8.5              | 3:1                                    |
| DMF 4:1  | 34.0                           | 8.5              | 4:1                                    |

**Table S2** Validation of BEN in sample 5 by UPLC-QTOF/MS.

| Name         | Identification formula             | Mass     | Error (ppm) |
|--------------|------------------------------------|----------|-------------|
|              | [M+H] <sup>+</sup>                 |          |             |
| BEN standard | C <sub>21</sub> H <sub>28</sub> NO | 310.2167 | -0.58       |
| Sample 5     | C <sub>21</sub> H <sub>28</sub> NO | 310.2153 | 4.01        |
